# Supplementary material for: Attributes of High-Performance Electron Transport Layers for Perovskite Solar Cells on Flexible PET versus on Glass
Source: PubMed Central journal article supplement (PMC9044394; doi:10.1021/acsaem.1c03311), 2022-04-06
Supplement: ae1c03311_si_001.pdf [file ae1c03311_si_001.pdf]

## Supporting Information

# Attributes of high-performance electron transport layers for perovskite solar cells on flexible PET vs on glass

Marwa Dkhili<sup>a,b,c,d</sup>, Giulia Lucarelli<sup>a</sup>, Francesca De Rossi<sup>a</sup>, Babak Taheri<sup>a</sup>, Khadija Hammedi<sup>b,c,d</sup>, Hatem Ezzaouia<sup>b,c</sup>, Francesca Brunetti<sup>a\*</sup>, Thomas M. Brown<sup>a\*</sup>

<sup>a</sup> CHOSE (Centre for Hybrid and Organic Solar Energy), Department of Electronic Engineering, University of Rome Tor Vergata, Via del Politecnico 1, 00133 Rome, Italy

<sup>b</sup> Laboratory of Semiconductors, Nanostructures and Advanced Technology (LSNTA), Research and Technology Center of Energy (CRTEen), BP 95, 2050 Hammam-Lif, Tunisia

<sup>c</sup> Photovoltaic Laboratory, Research and Technology Centre of Energy (CRTEen), BP 95, 2050 Hammam-Lif, Tunisia

<sup>d</sup> Faculty of Sciences of Tunis, El Manar University, 2092 Tunis, Tunisia

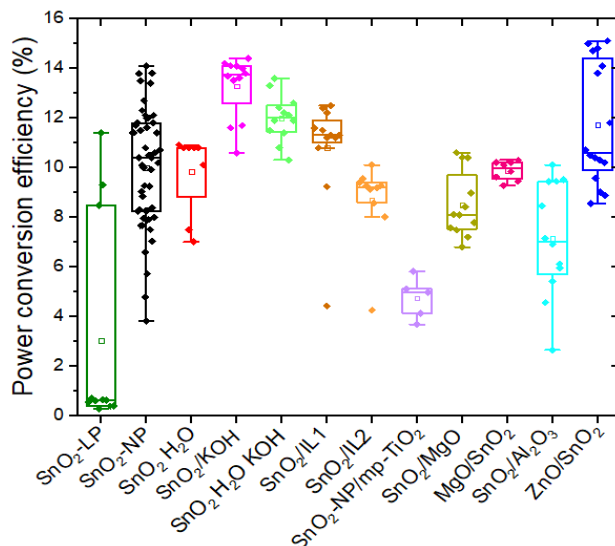

**Figure S1.** Statistical distribution of power conversion efficiency of flexible perovskite solar cells on PET/ITO substrates based on 12 different electron transport layers i.e. SnO<sub>2</sub>-LP, SnO<sub>2</sub>-NP, SnO<sub>2</sub>-H<sub>2</sub>O, SnO<sub>2</sub>/KOH, SnO<sub>2</sub>-H<sub>2</sub>O/KOH, SnO<sub>2</sub>/IL1, SnO<sub>2</sub>/IL2, SnO<sub>2</sub>/mp-TiO<sub>2</sub>, SnO<sub>2</sub>/MgO, MgO/SnO<sub>2</sub>, SnO<sub>2</sub>/Al<sub>2</sub>O<sub>3</sub> and ZnO/SnO<sub>2</sub>, where IL1 and IL2 are 1-benzyl-3-methylimidazolium chloride and 1-butyl-3-methylimidazolium tetrafluoroborate, respectively

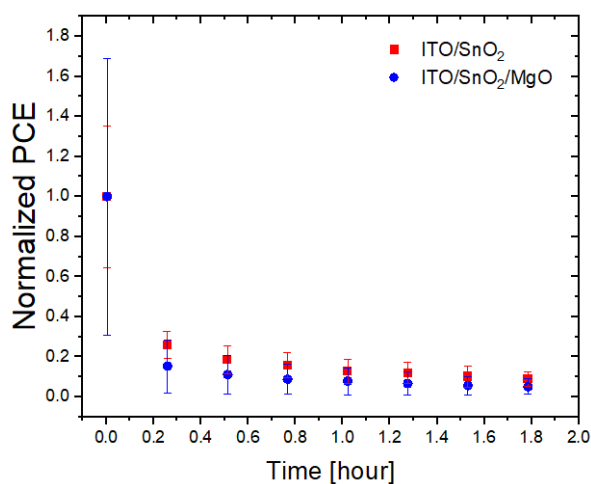

**Figure S2.** Light soaking stability measurements, at 1 sun illumination, under ambient temperature and relative humidity (R.H) in the range of [30, 60%], over time of PET/ITO/electron transport layer/perovskite/spiro-OMeTAD/Au architecture based on SnO<sub>2</sub> (Red squared data points) and SnO<sub>2</sub>/MgO (Blue circles) electron transport layers.

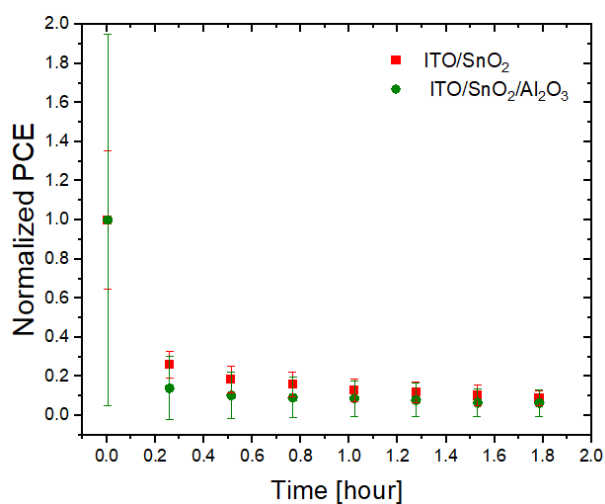

**Figure S3.** Light soaking stability measurements, at 1 sun illumination, under ambient temperature and relative humidity (R.H) in the range of [30, 60%], over time of PET/ITO/electron transport layer/perovskite/spiro-OMeTAD/Au architecture based on SnO<sub>2</sub> (Red squared data points) and SnO<sub>2</sub>/Al<sub>2</sub>O<sub>3</sub> (Green circles) electron transport layers.

**Table S1.** Power conversion efficiencies of the best cells measured for the different ETLs-based perovskite solar cells under standard test conditions.

| <i>Electron transport layers</i>                   | <i>PCEs of the best cells (%)</i> |
|----------------------------------------------------|-----------------------------------|
|                                                    | <i>Reverse scan</i>               |
| <i>SnO<sub>2</sub>-NP</i>                          | <i>14.1</i>                       |
| <i>SnO<sub>2</sub>-LP</i>                          | <i>11.4</i>                       |
| <i>SnO<sub>2</sub>-H<sub>2</sub>O</i>              | <i>10.9</i>                       |
| <i>SnO<sub>2</sub>/KOH</i>                         | <i>11.9</i>                       |
| <i>SnO<sub>2</sub>-H<sub>2</sub>O/KOH</i>          | <i>13.1</i>                       |
| <i>SnO<sub>2</sub>/IL1</i>                         | <i>12.5</i>                       |
| <i>SnO<sub>2</sub>/IL2</i>                         | <i>10.1</i>                       |
| <i>SnO<sub>2</sub>/meso-TiO<sub>2</sub></i>        | <i>8.94</i>                       |
| <i>SnO<sub>2</sub>/MgO</i>                         | <i>10.6</i>                       |
| <i>MgO/SnO<sub>2</sub></i>                         | <i>10.3</i>                       |
| <i>SnO<sub>2</sub>/Al<sub>2</sub>O<sub>3</sub></i> | <i>10.1</i>                       |
| <i>ZnO/SnO<sub>2</sub></i>                         | <i>14.8</i>                       |

**Table S2.** Average PV parameters with best cells of flexible and rigid perovskite solar cells with different ETL types.

| <b>Device type</b>                                       | <b>Voc (V)</b>      | <b>Jsc (mA/cm<sup>2</sup>)</b> | <b>FF (%)</b>         | <b>PCE(%)</b>         |
|----------------------------------------------------------|---------------------|--------------------------------|-----------------------|-----------------------|
| <b>SnO<sub>2</sub>-PET</b>                               | 0.94±0.02<br>[0.92] | 18.39±0.08<br>[18.45]          | 49.2±5.77<br>[53.28]  | 8.51±1.22<br>[9.37]   |
| <b>SnO<sub>2</sub>-Glass</b>                             | 0.95±0.08<br>[1.02] | 21.86±3.003<br>[18.72]         | 60.41±4.84<br>[65.99] | 12.47±1.27<br>[12.61] |
| <b>SnO<sub>2</sub>/Al<sub>2</sub>O<sub>3</sub>-PET</b>   | 0.9±0.04<br>[0.94]  | 11.85±1.5<br>[13.48]           | 49.69±3.22<br>[53.41] | 5.36±1.25<br>[6.79]   |
| <b>SnO<sub>2</sub>/Al<sub>2</sub>O<sub>3</sub>-Glass</b> | 1.01±0.01<br>[1.02] | 18.37±1.66<br>[19.22]          | 54.08±7.73<br>[62.85] | 10.13±2.21<br>[12.36] |
| <b>SnO<sub>2</sub>/MgO-PET</b>                           | 0.95±0.14<br>[1.05] | 15.22±2.26<br>[17.05]          | 56.09±8.11<br>[64.93] | 8.17±2.36<br>[11.61]  |
| <b>SnO<sub>2</sub>/MgO-Glass</b>                         | 1.03±0.03<br>[1.06] | 14.55±1.11<br>[13.27]          | 52.89±5.11<br>[56.78] | 7.89±0.65<br>[7.99]   |
| <b>ZnO/SnO<sub>2</sub>-PET</b>                           | 1.05±0.01<br>[1.04] | 17.23±0.31<br>[17.1]           | 52.5±9.1<br>[66.07]   | 9.49±1.51<br>[11.75]  |

|                                  |           |            |            |            |
|----------------------------------|-----------|------------|------------|------------|
| <b>ZnO/SnO<sub>2</sub>-Glass</b> | 1.07±0.02 | 17.67±0.33 | 54.43±1.44 | 10.32±0.62 |
|                                  | [1.08]    | [17.90]    | [55.45]    | [10.76]    |

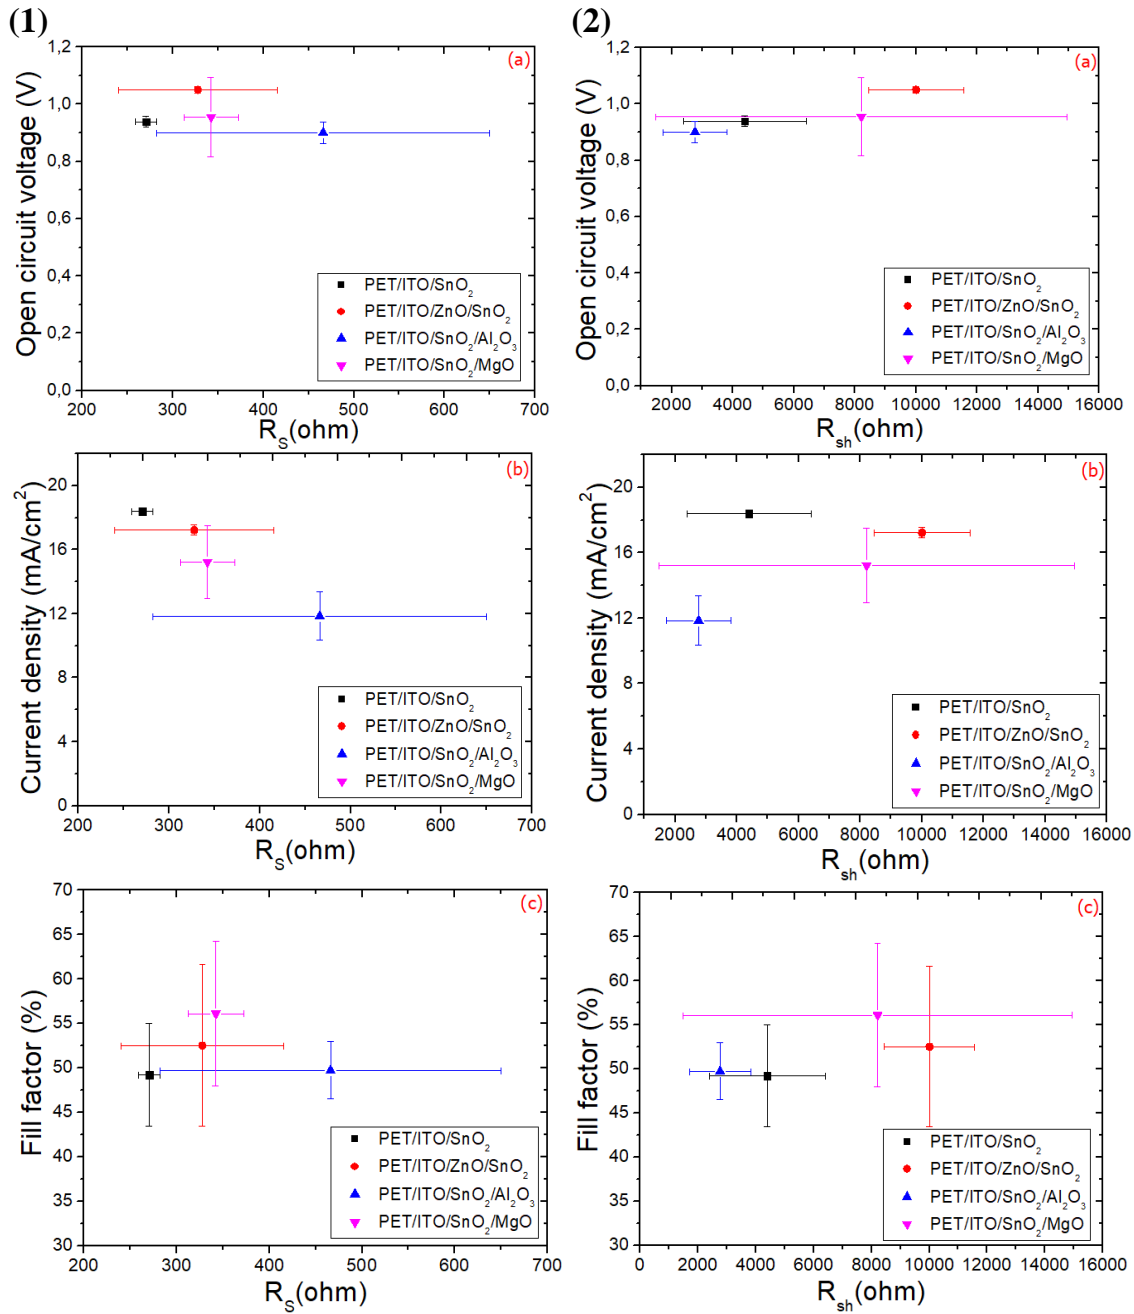

**Figure S4.** Dependence of average  $V_{oc}$  (a),  $J_{sc}$ (b) and FF(c) on series resistance (1) and shunt resistance (2) of four electron transport layers-based flexible perovskite solar cells.

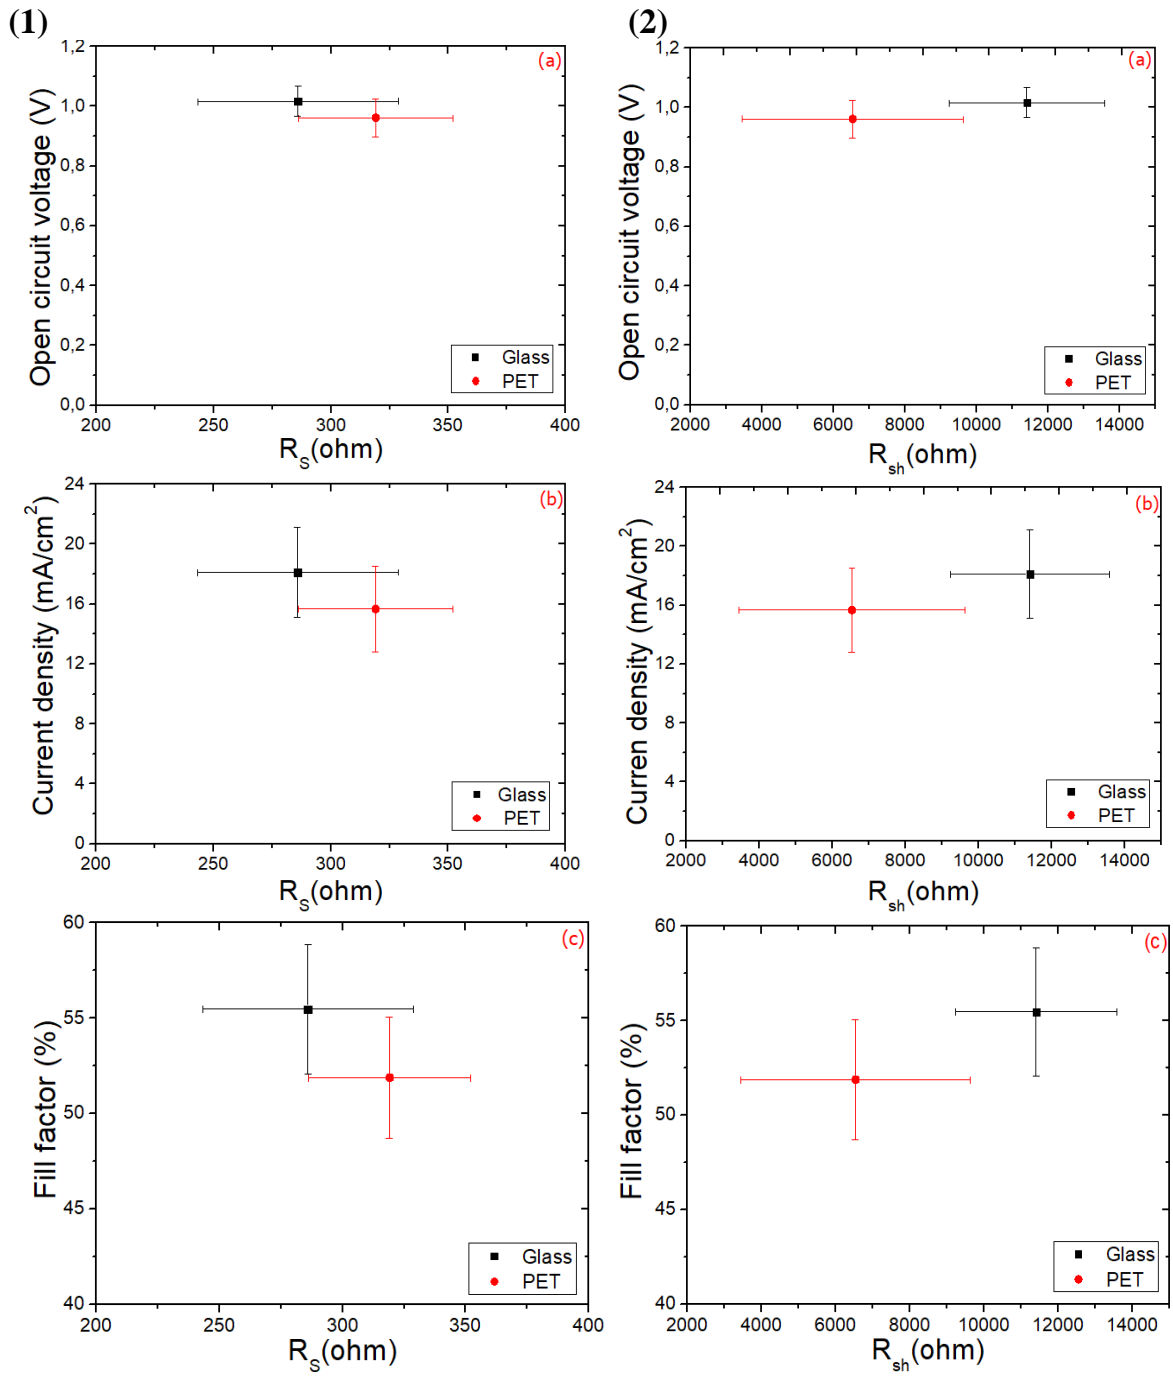

**Figure S5.** Dependence of average  $V_{oc}$  (a),  $J_{sc}$ (b) and FF(c) on series resistance (1) and shunt resistance (2) of all flexible and glass perovskite solar cells.

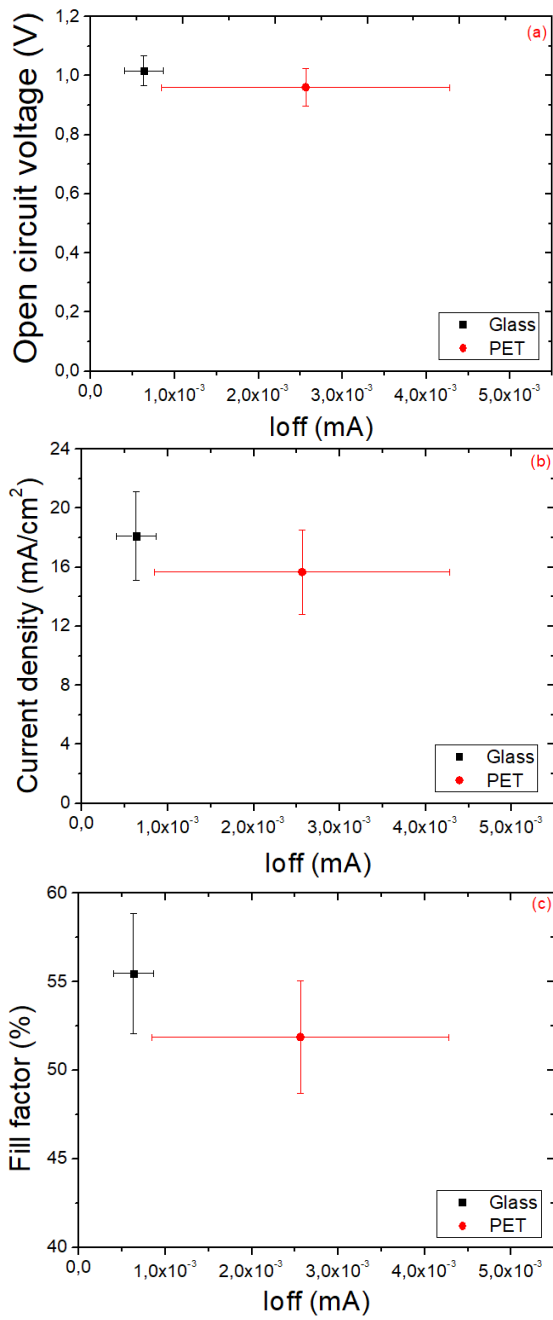

**Figure S6.** Average  $V_{oc}$  (a),  $J_{sc}$  (b) and FF (c) of all flexible and rigid devices based on different ETLs as a function of reverse currents.

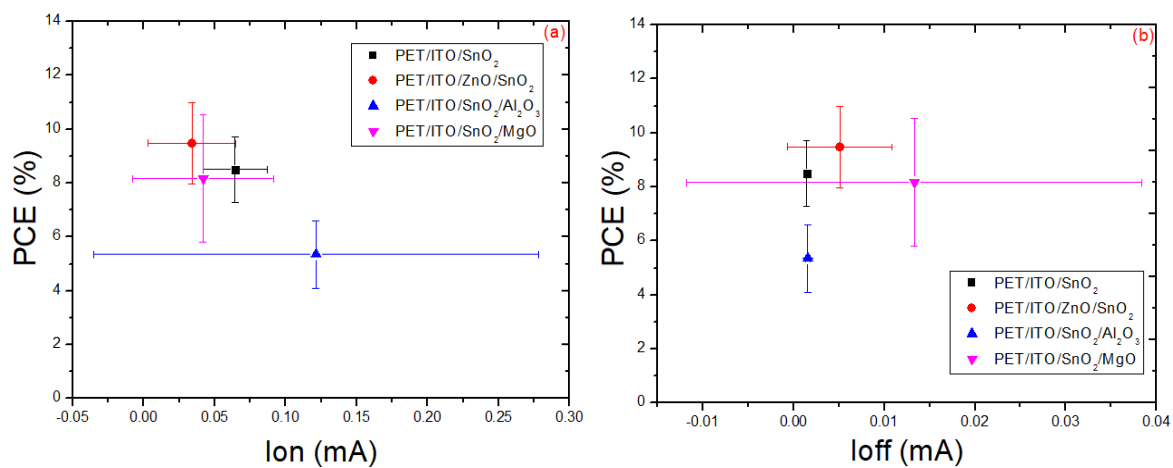

**Figure S7.** Average power conversion efficiencies (PCE) of four electron transport layers-based flexible perovskite solar cells as a function of forward (a) and reverse (b) currents measured in the dark extracted at 1 V and -1 V, respectively.
